# Supplementary material for: Effect of Elevated CO2 during Low Temperature Storage on the Quality Attributes of Cut Spearmint
Source: MDPI journal article supplement (doi:10.3390/horticulturae8020126), 2022-01-30
Supplement: s1 [file s1]

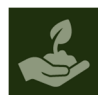

**Table S1:** Volatile compounds detected in fresh spearmint (and in spearmint stored in air, in presence of 5 % CO<sub>2</sub>, 10% CO<sub>2</sub> and 20% CO<sub>2</sub> in 5, 10 and 14 days of storage. Mean values of three replicates  $\pm$  standard error (n=3).

| Treatment                                                 |      | Air   | 5%    | 10%   | 20%   | Air   | 5%    | 10%   | 20%   | Air   | 5%    | 10%   | 20%   | Air   | 5%    | 10%   |
|-----------------------------------------------------------|------|-------|-------|-------|-------|-------|-------|-------|-------|-------|-------|-------|-------|-------|-------|-------|
|                                                           |      | (D0)  | (D0)  | (D0)  | (D0)  | (D5)  | (D5)  | (D5)  | (D5)  | (D10) | (D10) | (D10) | (D0)  | (D14) | (D14) | (D14) |
| Dimethyl sulfide (C1)                                     | Mean | 0.006 | 0.006 | 0.006 | 0.006 | 0.086 | 0.377 | 0.177 | 0.098 | 0.114 | 0.263 | 0.073 | 0.022 | 0.094 | 0.184 | 0.041 |
|                                                           |      | 12    | 12    | 12    | 12    | 561   | 63    | 708   | 341   | 642   | 77    | 838   | 565   | 864   | 256   | 722   |
|                                                           | SE   | 0.003 | 0.003 | 0.003 | 0.003 | 0.003 | 0.306 | 0.096 | 0.004 | 0.031 | 0.038 | 0.002 | 0.002 | 0.017 | 0.054 | 0.006 |
| Ethanol (C2)                                              |      | 593   | 593   | 593   | 593   | 901   | 133   | 681   | 229   | 595   | 243   | 102   | 2     | 612   | 512   | 369   |
|                                                           | Mean | 0.001 | 0.001 | 0.001 | 0.001 | 0.001 | 0.003 | 0.001 | 0.085 | 0.008 | 0.004 | 0.008 | 0.093 | 0.003 | 0.004 | 0.006 |
|                                                           |      | 722   | 722   | 722   | 722   | 526   | 761   | 548   | 126   | 219   | 13    | 511   | 136   | 514   | 272   | 341   |
| Butanoic acid, methyl ester (C3)                          | SE   | 0.000 | 0.000 | 0.000 | 0.000 | 0.000 | 0.001 | 0.001 | 0.033 | 0.003 | 0.001 | 0.004 | 0.026 | 0.000 | 0.001 | 0.003 |
|                                                           |      | 487   | 487   | 487   | 487   | 254   | 673   | 103   | 938   | 848   | 381   | 12    | 263   | 368   | 382   | 246   |
|                                                           | Mean | 0.114 | 0.114 | 0.114 | 0.114 | 0.006 |       | 0.002 |       |       | 0.002 |       |       | 0.000 | 0.000 |       |
| Butanoic acid, 2-methyl-, methyl ester (C4)               |      | 981   | 981   | 981   | 981   | 424   | 0     | 771   | 0     | 0     | 223   | 0     | 0     | 718   | 638   | 0     |
|                                                           | SE   | 0.023 | 0.023 | 0.023 | 0.023 | 0.006 |       | 0.002 |       |       | 0.002 |       |       | 0.000 | 0.000 |       |
|                                                           |      | 047   | 047   | 047   | 047   | 424   | 0     | 771   | 0     | 0     | 223   | 0     | 0     | 718   | 638   | 0     |
| (1S)-2,6,6-Trimethylbicyclo[3.1.1]hept-2-ene (C5)         | Mean | 0.252 | 0.252 | 0.252 | 0.252 | 0.250 | 0.364 | 0.106 | 0.000 | 0.102 | 0.145 | 0.002 | 0.000 | 0.092 | 0.072 | 0.002 |
|                                                           |      | 212   | 212   | 212   | 212   | 227   | 693   | 426   | 811   | 982   | 958   | 862   | 684   | 181   | 892   | 163   |
|                                                           | SE   | 0.025 | 0.025 | 0.025 | 0.025 | 0.058 | 0.174 | 0.054 | 7.45E | 0.024 | 0.040 | 0.000 | 8.14E | 0.008 | 0.011 | 0.001 |
| Bicyclo[3.1.0]hex-2-ene, 2-methyl-5-(1-methylethyl)- (C6) |      | 092   | 092   | 092   | 092   | 167   | 269   | 822   | -05   | 878   | 755   | 6     | -05   | 454   | 164   | 06    |
|                                                           | Mean | 0.600 | 0.600 | 0.600 | 0.600 | 0.602 | 0.768 | 0.115 | 0.024 | 0.139 | 0.206 | 0.031 | 0.025 | 0.215 | 0.089 | 0.043 |
|                                                           |      | 963   | 963   | 963   | 963   | 648   | 54    | 261   | 008   | 504   | 23    | 63    | 352   | 571   | 7     | 653   |
| Camphene (C7)                                             | SE   | 0.029 | 0.029 | 0.029 | 0.029 | 0.289 | 0.250 | 0.079 | 0.000 | 0.031 | 0.069 | 0.004 | 0.001 | 0.057 | 0.003 | 0.008 |
|                                                           |      | 44    | 44    | 44    | 44    | 989   | 269   | 347   | 248   | 049   | 09    | 455   | 634   | 849   | 217   | 654   |
|                                                           | Mean | 0.036 | 0.036 | 0.036 | 0.036 | 0.033 | 0.058 | 0.006 | 0.001 | 0.005 | 0.008 | 0.001 | 0.006 | 0.006 | 0.003 | 0.002 |
|                                                           |      | 837   | 837   | 837   | 837   | 193   | 991   | 999   | 599   | 583   | 165   | 353   | 01    | 729   | 778   | 639   |
|                                                           | SE   | 0.002 | 0.002 | 0.002 | 0.002 | 0.016 | 0.033 | 0.005 | 0.000 | 0.001 | 0.002 | 0.000 | 0.000 | 0.001 | 0.000 | 0.000 |
|                                                           |      | 837   | 837   | 837   | 837   | 561   | 412   | 164   | 24    | 98    | 547   | 415   | 389   | 087   | 354   | 462   |
|                                                           | Mean | 0.086 | 0.086 | 0.086 | 0.086 | 0.075 | 0.087 | 0.014 | 0.001 | 0.021 | 0.029 | 0.002 | 0.002 | 0.031 | 0.012 | 0.005 |
|                                                           |      | 011   | 011   | 011   | 011   | 785   | 786   | 08    | 755   | 332   | 531   | 803   | 674   | 097   | 629   | 282   |

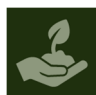

|                                                                   |      |       |       |       |       |       |       |       |       |       |       |       |       |       |       |       |
|-------------------------------------------------------------------|------|-------|-------|-------|-------|-------|-------|-------|-------|-------|-------|-------|-------|-------|-------|-------|
|                                                                   | SE   | 0.004 | 0.004 | 0.004 | 0.004 | 0.034 | 0.012 | 0.009 | 6.34E | 0.006 | 0.011 | 0.000 | 0.000 | 0.010 | 0.000 | 0.001 |
|                                                                   |      | 726   | 726   | 726   | 726   | 661   | 17    | 862   | -05   | 838   | 288   | 736   | 406   | 261   | 946   | 488   |
| Hexanal (C8)                                                      | Mean | 0.003 | 0.003 | 0.003 | 0.003 | 0.002 | 0.007 | 0.018 | 0.020 | 0.016 | 0.011 | 0.027 | 0.006 | 0.009 | 0.007 | 0.008 |
|                                                                   |      | 583   | 583   | 583   | 583   | 63    | 668   | 16    | 183   | 614   | 17    | 317   | 648   | 958   | 878   | 155   |
|                                                                   | SE   | 0.000 | 0.000 | 0.000 | 0.000 | 0.000 | 0.006 | 0.012 | 0.004 | 0.005 | 0.003 | 0.009 | 0.000 | 0.003 | 0.003 | 0.002 |
|                                                                   |      | 792   | 792   | 792   | 792   | 607   | 174   | 205   | 27    | 757   | 432   | 798   | 359   | 752   | 65    | 437   |
| .beta.-Pinene (C9)                                                | Mean | 0.755 | 0.755 | 0.755 | 0.755 | 0.754 | 0.929 | 0.153 | 0.035 | 0.180 | 0.262 | 0.042 | 0.033 | 0.268 | 0.115 | 0.056 |
|                                                                   |      | 087   | 087   | 087   | 087   | 015   | 156   | 095   | 039   | 693   | 69    | 236   | 72    | 208   | 157   | 813   |
|                                                                   | SE   | 0.054 | 0.054 | 0.054 | 0.054 | 0.355 | 0.248 | 0.104 | 0.000 | 0.036 | 0.083 | 0.005 | 0.001 | 0.066 | 0.003 | 0.012 |
|                                                                   |      | 136   | 136   | 136   | 136   | 325   | 687   | 335   | 98    | 881   | 014   | 795   | 772   | 036   | 556   | 067   |
| Bicyclo[3.1.0]hexane,<br>4-methylene-1-(1-<br>methylethyl)- (C10) | Mean | 0.333 | 0.333 | 0.333 | 0.333 | 0.466 | 0.540 | 0.107 | 0.024 | 0.118 | 0.177 | 0.028 | 0.021 | 0.164 | 0.074 | 0.038 |
|                                                                   |      | 72    | 72    | 72    | 72    | 896   | 905   | 035   | 369   | 243   | 671   | 663   | 842   | 664   | 59    | 945   |
|                                                                   | SE   | 0.015 | 0.015 | 0.015 | 0.015 | 0.237 | 0.121 | 0.072 | 0.001 | 0.026 | 0.058 | 0.003 | 0.001 | 0.035 | 0.002 | 0.008 |
|                                                                   |      | 111   | 111   | 111   | 111   | 63    | 668   | 236   | 037   | 687   | 426   | 274   | 183   | 543   | 717   | 354   |
| .beta.-Myrcene (C11)                                              | Mean | 4.461 | 4.461 | 4.461 | 4.461 | 3.566 | 3.571 | 1.323 | 0.322 | 1.805 | 2.401 | 0.429 | 0.283 | 2.094 | 1.124 | 0.530 |
|                                                                   |      | 165   | 165   | 165   | 165   | 61    | 051   | 577   | 93    | 825   | 833   | 435   | 986   | 579   | 663   | 502   |
|                                                                   | SE   | 0.375 | 0.375 | 0.375 | 0.375 | 0.859 | 0.934 | 0.761 | 0.018 | 0.316 | 0.701 | 0.007 | 0.021 | 0.246 | 0.087 | 0.105 |
|                                                                   |      | 25    | 25    | 25    | 25    | 891   | 154   | 4     | 755   | 65    | 751   | 903   | 265   | 603   | 157   | 232   |
| D-limonene (C12)                                                  | Mean | 17.05 | 17.05 | 17.05 | 17.05 | 20.11 | 26.81 | 6.243 | 1.083 | 6.971 | 9.149 | 1.225 | 0.933 | 7.220 | 3.210 | 1.563 |
|                                                                   |      | 112   | 112   | 112   | 112   | 747   | 686   | 128   | 332   | 101   | 152   | 003   | 861   | 329   | 633   | 468   |
|                                                                   | SE   | 1.393 | 1.393 | 1.393 | 1.393 | 8.316 | 6.471 | 4.116 | 0.036 | 1.811 | 2.992 | 0.086 | 0.072 | 0.665 | 0.144 | 0.263 |
|                                                                   |      | 458   | 458   | 458   | 458   | 262   | 864   | 441   | 492   | 202   | 542   | 326   | 184   | 144   | 524   | 97    |
| Eucapypitol (C13)                                                 | Mean | 1.353 | 1.353 | 1.353 | 1.353 | 1.488 | 2.041 | 0.780 | 0.208 | 0.663 | 0.867 | 0.211 | 0.134 | 0.712 | 0.558 | 0.179 |
|                                                                   |      | 77    | 77    | 77    | 77    | 99    | 88    | 968   | 814   | 874   | 589   | 755   | 988   | 207   | 788   | 439   |
|                                                                   | SE   | 0.208 | 0.208 | 0.208 | 0.208 | 0.360 | 0.710 | 0.441 | 0.013 | 0.146 | 0.220 | 0.042 | 0.022 | 0.041 | 0.066 | 0.010 |
|                                                                   |      | 382   | 382   | 382   | 382   | 639   | 343   | 043   | 282   | 065   | 09    | 427   | 14    | 071   | 871   | 435   |
| Bicyclo[4.2.0]oct-1-<br>ene, 7-exo-ethenyl-<br>(C14)              | Mean | 0.037 | 0.037 | 0.037 | 0.037 | 0.043 | 0.051 | 0.023 | 0.015 | 0.027 | 0.032 | 0.008 | 0.018 | 0.027 | 0.017 | 0.011 |
|                                                                   |      | 431   | 431   | 431   | 431   | 755   | 289   | 014   | 211   | 347   | 761   | 712   | 906   | 495   | 917   | 743   |
|                                                                   | SE   | 0.001 | 0.001 | 0.001 | 0.001 | 0.009 | 0.010 | 0.013 | 0.002 | 0.005 | 0.006 | 0.001 | 0.002 | 0.002 | 0.001 | 0.001 |
|                                                                   |      | 121   | 121   | 121   | 121   | 694   | 295   | 168   | 146   | 317   | 064   | 655   | 375   | 015   | 537   | 423   |



|                                        |      |       |       |       |       |       |       |       |       |       |       |       |       |       |       |       |
|----------------------------------------|------|-------|-------|-------|-------|-------|-------|-------|-------|-------|-------|-------|-------|-------|-------|-------|
| 2-Hexenal, (E)- (C15)                  | Mean | 0.017 | 0.017 | 0.017 | 0.017 | 0.137 | 0.344 | 0.413 | 1.379 | 1.382 | 0.425 | 1.235 | 0.209 | 0.857 | 0.563 | 0.518 |
|                                        |      | 705   | 705   | 705   | 705   | 126   | 865   | 406   | 248   | 984   | 406   | 795   | 321   | 121   | 097   | 849   |
|                                        |      | SE    | 0.010 | 0.010 | 0.010 | 0.105 | 0.306 | 0.308 | 0.369 | 0.645 | 0.184 | 0.352 | 0.021 | 0.390 | 0.213 | 0.230 |
| trans-.beta.-Ocimene<br>(C16)          | Mean | 662   | 662   | 662   | 662   | 738   | 792   | 061   | 85    | 822   | 989   | 211   | 365   | 574   | 739   | 405   |
|                                        |      | 1.416 | 1.416 | 1.416 | 1.416 | 0.798 | 0.723 | 0.287 | 0.077 | 0.478 | 0.526 | 0.114 | 0.069 | 0.533 | 0.281 | 0.130 |
|                                        |      | 257   | 257   | 257   | 257   | 317   | 062   | 768   | 441   | 719   | 47    | 117   | 439   | 608   | 324   | 736   |
| .gamma.-Terpinene<br>(C17)             | Mean | 0.128 | 0.128 | 0.128 | 0.128 | 0.162 | 0.235 | 0.152 | 0.005 | 0.084 | 0.120 | 0.006 | 0.003 | 0.053 | 0.016 | 0.021 |
|                                        |      | 889   | 889   | 889   | 889   | 446   | 711   | 383   | 525   | 079   | 436   | 624   | 028   | 834   | 907   | 058   |
|                                        |      | SE    | 0.018 | 0.018 | 0.018 | 0.027 | 0.032 | 0.005 | 0.000 | 0.006 | 0.011 | 0.000 | 0.001 | 0.005 | 0.002 | 0.000 |
| cis.beta.-Ocimene<br>(C18)             | Mean | 382   | 382   | 382   | 382   | 465   | 723   | 259   | 487   | 548   | 223   | 78    | 23    | 635   | 702   | 85    |
|                                        |      | 0.000 | 0.000 | 0.000 | 0.000 | 0.011 | 0.013 | 0.004 | 7.26E | 0.002 | 0.005 | 0.000 | 0.000 | 0.002 | 0.000 | 0.000 |
|                                        |      | 776   | 776   | 776   | 776   | 715   | 86    | 79    | -05   | 683   | 383   | 142   | 393   | 797   | 794   | 141   |
| 3-Octanone (C19)                       | Mean | 0.594 | 0.594 | 0.594 | 0.594 | 0.264 | 0.195 | 0.071 | 0.021 | 0.147 | 0.173 | 0.029 | 0.019 | 0.220 | 0.093 | 0.038 |
|                                        |      | 57    | 57    | 57    | 57    | 018   | 928   | 535   | 053   | 446   | 863   | 927   | 531   | 32    | 941   | 981   |
|                                        |      | SE    | 0.040 | 0.040 | 0.040 | 0.040 | 0.066 | 0.100 | 0.035 | 0.001 | 0.032 | 0.044 | 0.004 | 0.000 | 0.037 | 0.004 |
| 1,3,5,7-<br>Cyclooctatetraene<br>(C20) | Mean | 71    | 71    | 71    | 71    | 48    | 229   | 811   | 291   | 271   | 96    | 341   | 556   | 424   | 443   | 507   |
|                                        |      | 0.047 | 0.047 | 0.047 | 0.047 | 0.061 | 0.043 | 0.095 | 0.052 | 0.113 | 0.151 | 0.072 | 0.031 | 0.071 | 0.120 | 0.030 |
|                                        |      | 876   | 876   | 876   | 876   | 93    | 878   | 18    | 085   | 956   | 861   | 207   | 215   | 68    | 781   | 708   |
| p-Cymene (C21)                         | Mean | 0.006 | 0.006 | 0.006 | 0.006 | 0.032 | 0.006 | 0.053 | 0.012 | 0.014 | 0.013 | 0.012 | 0.003 | 0.004 | 0.015 | 0.004 |
|                                        |      | 848   | 848   | 848   | 848   | 864   | 101   | 81    | 819   | 131   | 209   | 204   | 375   | 578   | 827   | 45    |
|                                        |      | SE    | 0.103 | 0.103 | 0.103 | 0.103 | 0.024 | 0.022 | 0.010 | 0.004 | 0.019 | 0.017 | 0.004 | 0.003 | 0.015 | 0.003 |
| .alfa.-Terpinolene<br>(C22)            | Mean | 0.018 | 0.018 | 0.018 | 0.018 | 0.001 | 0.002 | 0.005 | 0.000 | 0.003 | 0.003 | 0.000 | 0.000 | 0.001 | 0.003 | 0.000 |
|                                        |      | 043   | 043   | 043   | 043   | 888   | 703   | 45    | 111   | 401   | 401   | 643   | 408   | 639   | 191   | 609   |
|                                        |      | SE    | 0.026 | 0.026 | 0.026 | 0.026 | 0.037 | 0.054 | 0.043 | 0.005 | 0.048 | 0.024 | 0.006 | 0.005 | 0.025 | 0.003 |
|                                        | Mean | 669   | 669   | 669   | 669   | 747   | 341   | 587   | 631   | 3     | 921   | 102   | 222   | 62    | 31    | 68    |
|                                        |      | 0.000 | 0.000 | 0.000 | 0.000 | 0.008 | 0.021 | 0.024 | 0.001 | 0.015 | 0.002 | 0.002 | 0.000 | 0.005 | 0.002 | 0.000 |
|                                        |      | 677   | 677   | 677   | 677   | 271   | 239   | 909   | 316   | 597   | 197   | 215   | 423   | 872   | 004   | 337   |
|                                        | Mean | 0.030 | 0.030 | 0.030 | 0.030 | 0.046 | 0.060 | 0.018 | 0.003 | 0.024 | 0.033 | 0.004 | 0.003 | 0.030 | 0.015 | 0.005 |
|                                        |      | 868   | 868   | 868   | 868   | 224   | 925   | 04    | 265   | 281   | 907   | 545   | 334   | 796   | 5     | 7     |



|                                          |      |       |       |       |       |       |       |       |       |       |       |       |       |       |       |       |
|------------------------------------------|------|-------|-------|-------|-------|-------|-------|-------|-------|-------|-------|-------|-------|-------|-------|-------|
| 2-Hexen-1-ol,<br>acetate, (Z)- (C23)     | SE   | 0.002 | 0.002 | 0.002 | 0.002 | 0.011 | 0.008 | 0.011 | 0.000 | 0.004 | 0.009 | 0.000 | 0.000 | 0.005 | 0.001 | 0.001 |
|                                          |      | 301   | 301   | 301   | 301   | 986   | 922   | 443   | 362   | 187   | 964   | 195   | 293   | 259   | 34    | 448   |
|                                          | Mean | 0.006 | 0.006 | 0.006 | 0.006 | 0.010 | 0.002 | 0.001 | 0.000 | 0.047 | 0.015 | 0.012 | 0.014 | 0.035 | 0.016 | 0.016 |
| 1-Hexanol (C24)                          |      | 868   | 868   | 868   | 868   | 165   | 847   | 855   | 894   | 227   | 706   | 449   | 221   | 948   | 21    | 811   |
|                                          | SE   | 0.003 | 0.003 | 0.003 | 0.003 | 0.007 | 0.001 | 0.000 | 0.000 | 0.024 | 0.005 | 0.003 | 0.002 | 0.013 | 0.005 | 0.006 |
|                                          |      | 692   | 692   | 692   | 692   | 957   | 064   | 942   | 178   | 447   | 353   | 296   | 83    | 627   | 639   | 04    |
| Cyclopropane, 1,2,3-<br>trimethyl- (C25) | Mean | 0.003 | 0.003 | 0.003 | 0.003 | 0.027 | 0.178 | 0.104 | 0.073 | 0.315 | 0.093 | 0.104 | 0.030 | 0.143 | 0.066 | 0.015 |
|                                          |      | 267   | 267   | 267   | 267   | 78    | 784   | 5     | 824   | 057   | 256   | 355   | 239   | 962   | 269   | 494   |
|                                          | SE   | 0.001 | 0.001 | 0.001 | 0.001 | 0.012 | 0.170 | 0.076 | 0.043 | 0.131 | 0.050 | 0.040 | 0.006 | 0.063 | 0.035 | 0.001 |
| 3-Hexen-1-ol, (E)-<br>(C26)              |      | 397   | 397   | 397   | 397   | 424   | 18    | 201   | 838   | 577   | 667   | 216   | 137   | 649   | 635   | 105   |
|                                          | Mean | 0.072 | 0.072 | 0.072 | 0.072 | 0.139 | 0.103 | 0.081 | 0.024 | 0.100 | 0.108 | 0.022 | 0.019 | 0.117 | 0.083 | 0.047 |
|                                          |      | 46    | 46    | 46    | 46    | 721   | 839   | 558   | 971   | 238   | 193   | 216   | 141   | 991   | 855   | 528   |
| 3-Hexen-1-ol, (Z)-<br>(C27)              | SE   | 0.005 | 0.005 | 0.005 | 0.005 | 0.022 | 0.023 | 0.041 | 0.001 | 0.004 | 0.023 | 0.011 | 0.003 | 0.008 | 0.007 | 0.011 |
|                                          |      | 687   | 687   | 687   | 687   | 705   | 81    | 292   | 936   | 565   | 24    | 161   | 371   | 08    | 407   | 357   |
|                                          | Mean | 0.001 | 0.001 | 0.001 | 0.001 | 0.005 | 0.017 | 0.017 | 0.010 | 0.031 | 0.023 | 0.007 | 0.002 | 0.023 | 0.012 | 0.001 |
| 3-Octanol (C28)                          |      | 544   | 544   | 544   | 544   | 482   | 519   | 72    | 164   | 009   | 546   | 427   | 557   | 725   | 351   | 029   |
|                                          | SE   | 0.000 | 0.000 | 0.000 | 0.000 | 0.003 | 0.015 | 0.010 | 0.005 | 0.012 | 0.006 | 0.002 | 0.000 | 0.010 | 0.006 | 0.000 |
|                                          |      | 261   | 261   | 261   | 261   | 074   | 362   | 805   | 983   | 023   | 964   | 221   | 398   | 294   | 494   | 107   |
| 2-Hexen-1-ol, (E)-<br>(C29)              | Mean | 0.064 | 0.064 | 0.064 | 0.064 | 0.106 | 0.358 | 0.122 | 0.558 | 0.257 | 0.110 | 0.045 | 0.030 | 0.079 | 0.042 | 0.014 |
|                                          |      | 446   | 446   | 446   | 446   | 77    | 227   | 103   | 263   | 271   | 749   | 757   | 191   | 289   | 09    | 718   |
|                                          | SE   | 0.049 | 0.049 | 0.049 | 0.049 | 0.098 | 0.312 | 0.070 | 0.402 | 0.113 | 0.037 | 0.005 | 0.002 | 0.032 | 0.021 | 0.003 |
|                                          |      | 976   | 976   | 976   | 976   | 802   | 367   | 952   | 513   | 82    | 962   | 985   | 679   | 527   | 701   | 032   |
|                                          | Mean | 0.117 | 0.117 | 0.117 | 0.117 | 0.155 | 0.097 | 0.190 | 0.413 | 0.301 | 0.337 | 0.260 | 0.592 | 0.192 | 0.335 | 0.263 |
|                                          |      | 395   | 395   | 395   | 395   | 923   | 741   | 357   | 985   | 599   | 961   | 949   | 386   | 828   | 245   | 9     |
|                                          | SE   | 0.042 | 0.042 | 0.042 | 0.042 | 0.080 | 0.004 | 0.107 | 0.017 | 0.051 | 0.036 | 0.009 | 0.035 | 0.011 | 0.046 | 0.027 |
|                                          |      | 384   | 384   | 384   | 384   | 498   | 521   | 027   | 68    | 29    | 881   | 574   | 45    | 51    | 459   | 302   |
|                                          | Mean | 0.001 | 0.001 | 0.001 | 0.001 | 0.007 | 0.023 | 0.020 | 0.004 | 0.036 | 0.035 | 0.007 | 0.002 | 0.029 | 0.025 | 0.001 |
|                                          |      | 397   | 397   | 397   | 397   | 781   | 969   | 442   | 126   | 363   | 507   | 886   | 61    | 357   | 73    | 077   |
|                                          | SE   | 0.000 | 0.000 | 0.000 | 0.000 | 0.001 | 0.018 | 0.012 | 0.001 | 0.014 | 0.004 | 0.001 | 0.000 | 0.010 | 0.006 | 0.000 |
|                                          |      | 318   | 318   | 318   | 318   | 752   | 626   | 642   | 623   | 917   | 353   | 833   | 451   | 599   | 374   | 124   |



|                                                                                       |      |          |          |          |          |          |          |          |          |          |          |          |          |          |          |          |
|---------------------------------------------------------------------------------------|------|----------|----------|----------|----------|----------|----------|----------|----------|----------|----------|----------|----------|----------|----------|----------|
| Benzene, 1-methyl-4-(1-methylethenyl)-(C30)                                           | Mean | 0.068035 | 0.068035 | 0.068035 | 0.068035 | 0.029398 | 0.037808 | 0.028314 | 0.030237 | 0.071531 | 0.087443 | 0.045507 | 0.04427  | 0.083159 | 0.080315 | 0.060625 |
|                                                                                       | SE   | 0.004044 | 0.004044 | 0.004044 | 0.004044 | 0.021438 | 0.027869 | 0.015349 | 0.003532 | 0.005174 | 0.002143 | 0.00429  | 0.003831 | 0.000462 | 0.007159 | 0.011386 |
| Bicyclo[3.2.0]heptane, 6-methylene-/Bicyclo[4.1.0]heptane, 7-methylene-(C31)          | Mean | 0.05398  | 0.05398  | 0.05398  | 0.05398  | 0.116162 | 0.148141 | 0.064388 | 0.02104  | 0.074118 | 0.099644 | 0.02876  | 0.022577 | 0.089546 | 0.063019 | 0.02666  |
|                                                                                       | SE   | 0.012012 | 0.012012 | 0.012012 | 0.012012 | 0.010014 | 0.028208 | 0.034291 | 0.001168 | 0.005407 | 0.030938 | 0.005771 | 0.001331 | 0.013882 | 0.016621 | 0.007206 |
| 1-Octen-3-ol (C32)                                                                    | Mean | 0.052547 | 0.052547 | 0.052547 | 0.052547 | 0.195415 | 0.122635 | 0.309864 | 0.757022 | 0.410674 | 0.499524 | 0.321666 | 0.707161 | 0.211725 | 0.437846 | 0.276097 |
|                                                                                       | SE   | 0.025376 | 0.025376 | 0.025376 | 0.025376 | 0.158091 | 0.009423 | 0.175631 | 0.027351 | 0.092942 | 0.060469 | 0.007227 | 0.056378 | 0.050194 | 0.087507 | 0.047765 |
| Limonene oxide, trans- (C33)                                                          | Mean | 0.074879 | 0.074879 | 0.074879 | 0.074879 | 0.109465 | 0.116909 | 0.055759 | 0.013648 | 0.070424 | 0.081306 | 0.014204 | 0.015234 | 0.064126 | 0.041063 | 0.016049 |
|                                                                                       | SE   | 0.009084 | 0.009084 | 0.009084 | 0.009084 | 0.029749 | 0.015667 | 0.030718 | 0.000796 | 0.006231 | 0.011971 | 0.000474 | 0.0015   | 0.001415 | 0.002759 | 0.002016 |
| .alpha.-Cubebene (C34)                                                                | Mean | 0.487611 | 0.487611 | 0.487611 | 0.487611 | 0.248309 | 0.231717 | 0.049148 | 0.005919 | 0.071596 | 0.068726 | 0.004894 | 0.003839 | 0.091994 | 0.023007 | 0.00719  |
|                                                                                       | SE   | 0.064123 | 0.064123 | 0.064123 | 0.064123 | 0.079217 | 0.018077 | 0.025125 | 0.000458 | 0.015614 | 0.011899 | 0.001628 | 0.000379 | 0.029112 | 0.000889 | 0.001589 |
| Nonadecane (C35)                                                                      | Mean | 0.006783 | 0.006783 | 0.006783 | 0.006783 | 0.036104 | 0.056601 | 0.02842  | 0.040899 | 0.089265 | 0.168931 | 0.066385 | 0.081597 | 0.138006 | 0.081389 | 0.065306 |
|                                                                                       | SE   | 0.001629 | 0.001629 | 0.001629 | 0.001629 | 0.002651 | 0.020087 | 0.017183 | 0.017905 | 0.016009 | 0.062924 | 0.016693 | 0.002761 | 0.045258 | 0.043153 | 0.017142 |
| Cyclohexanone, 5-methyl-2-(1-methylethyl)-, (2R-trans)-/Cyclohexanone, 5-methyl-2-(1- | Mean | 0.01572  | 0.01572  | 0.01572  | 0.01572  | 0.067168 | 0.049329 | 0.067669 | 0.059925 | 0.112659 | 0.090934 | 0.081381 | 0.049703 | 0.090479 | 0.050203 | 0.052009 |
|                                                                                       | SE   | 0.000732 | 0.000732 | 0.000732 | 0.000732 | 0.031561 | 0.024577 | 0.034078 | 0.002995 | 0.017264 | 0.006985 | 0.013561 | 0.005726 | 0.004819 | 0.014388 | 0.002904 |



|                                                                                                                                                            |      |       |       |       |       |       |       |       |       |       |       |       |       |       |       |       |
|------------------------------------------------------------------------------------------------------------------------------------------------------------|------|-------|-------|-------|-------|-------|-------|-------|-------|-------|-------|-------|-------|-------|-------|-------|
| methylethyl)-, trans-<br>(C36)                                                                                                                             |      |       |       |       |       |       |       |       |       |       |       |       |       |       |       |       |
| (-)-.beta.-Bourbonene<br>(C37)                                                                                                                             | Mean | 13.55 | 13.55 | 13.55 | 13.55 | 7.378 | 5.995 | 2.018 | 0.552 | 2.304 | 2.055 | 0.404 | 0.410 | 2.518 | 1.148 | 0.446 |
|                                                                                                                                                            |      | 342   | 342   | 342   | 342   | 66    | 424   | 369   | 124   | 009   | 686   | 162   | 691   | 107   | 532   | 848   |
|                                                                                                                                                            | SE   | 1.041 | 1.041 | 1.041 | 1.041 | 1.904 | 0.484 | 1.011 | 0.000 | 0.468 | 0.406 | 0.045 | 0.028 | 0.346 | 0.136 | 0.078 |
|                                                                                                                                                            |      | 401   | 401   | 401   | 401   | 748   | 65    | 821   | 48    | 617   | 868   | 109   | 533   | 151   | 376   | 711   |
| 1H-<br>Cycloprop[e]azulene<br>, 1a,2,3,4,4a,5,6,7b-<br>octahydro-1,1,4,7-<br>tetramethyl-, [1aR-<br>(1a.alpha.,4.alpha.,4a<br>.beta.,7b.alpha.)]-<br>(C38) | Mean | 0.433 | 0.433 | 0.433 | 0.433 | 0.289 | 0.266 | 0.076 | 0.020 | 0.111 | 0.095 | 0.015 | 0.017 | 0.116 | 0.053 | 0.018 |
|                                                                                                                                                            | SE   | 444   | 444   | 444   | 444   | 574   | 464   | 403   | 816   | 125   | 677   | 593   | 216   | 171   | 537   | 282   |
|                                                                                                                                                            |      | 0.068 | 0.068 | 0.068 | 0.068 | 0.061 | 0.023 | 0.038 | 0.000 | 0.015 | 0.014 | 0.002 | 0.001 | 0.021 | 0.010 | 0.004 |
|                                                                                                                                                            |      | 008   | 008   | 008   | 008   | 632   | 712   | 32    | 377   | 194   | 911   | 947   | 161   | 275   | 273   | 206   |
| β-Cubebene (C39)                                                                                                                                           | Mean | 0.137 | 0.137 | 0.137 | 0.137 | 0.096 | 0.098 | 0.029 | 0.011 | 0.035 | 0.036 | 0.011 | 0.000 | 0.019 | 0.005 | 0.023 |
|                                                                                                                                                            |      | 166   | 166   | 166   | 166   | 02    | 812   | 464   | 141   | 724   | 607   | 768   | 494   | 887   | 686   | 781   |
|                                                                                                                                                            | SE   | 0.028 | 0.028 | 0.028 | 0.028 | 0.020 | 0.003 | 0.014 | 0.000 | 0.010 | 0.014 | 0.005 | 0.000 | 0.010 | 0.002 | 0.006 |
|                                                                                                                                                            |      | 294   | 294   | 294   | 294   | 87    | 058   | 834   | 982   | 373   | 068   | 413   | 106   | 229   | 302   | 181   |
| .beta.-ylangene (C40)                                                                                                                                      | Mean | 0.815 | 0.815 | 0.815 | 0.815 | 0.431 | 0.325 | 0.104 | 0.034 | 0.125 | 0.122 | 0.022 | 0.028 | 0.176 | 0.072 | 0.027 |
|                                                                                                                                                            |      | 468   | 468   | 468   | 468   | 79    | 222   | 612   | 94    | 99    | 843   | 772   | 827   | 028   | 368   | 848   |
|                                                                                                                                                            | SE   | 0.068 | 0.068 | 0.068 | 0.068 | 0.118 | 0.008 | 0.052 | 0.003 | 0.016 | 0.024 | 0.003 | 0.002 | 0.041 | 0.011 | 0.007 |
|                                                                                                                                                            |      | 668   | 668   | 668   | 668   | 356   | 57    | 372   | 133   | 334   | 929   | 179   | 131   | 963   | 54    | 012   |
| 1,6-Cyclodecadiene,<br>1-methyl-5-<br>methylene-8-(1-<br>methylethyl)-, [S-<br>(E,E)]-/.beta.-<br>copaene (C41)                                            | Mean | 1.172 | 1.172 | 1.172 | 1.172 | 0.625 | 0.508 | 0.172 | 0.068 | 0.209 | 0.180 | 0.047 | 0.058 | 0.232 | 0.119 | 0.051 |
|                                                                                                                                                            |      | 491   | 491   | 491   | 491   | 994   | 308   | 931   | 678   | 806   | 244   | 533   | 028   | 29    | 196   | 497   |
|                                                                                                                                                            | SE   | 0.139 | 0.139 | 0.139 | 0.139 | 0.155 | 0.012 | 0.086 | 0.001 | 0.031 | 0.030 | 0.004 | 0.006 | 0.038 | 0.019 | 0.012 |
|                                                                                                                                                            |      | 56    | 56    | 56    | 56    | 349   | 122   | 549   | 534   | 588   | 991   | 71    | 471   | 247   | 131   | 354   |
| Caryophyllene (C42)                                                                                                                                        | Mean | 9.159 | 9.159 | 9.159 | 9.159 | 4.731 | 4.329 | 1.494 | 0.462 | 1.699 | 1.535 | 0.355 | 0.390 | 1.893 | 0.924 | 0.411 |
|                                                                                                                                                            |      | 463   | 463   | 463   | 463   | 481   | 858   | 409   | 611   | 414   | 493   | 445   | 777   | 279   | 043   | 499   |
|                                                                                                                                                            | SE   | 1.126 | 1.126 | 1.126 | 1.126 | 1.135 | 0.118 | 0.755 | 0.010 | 0.306 | 0.213 | 0.026 | 0.022 | 0.302 | 0.075 | 0.058 |
|                                                                                                                                                            |      | 769   | 769   | 769   | 769   | 471   | 898   | 974   | 918   | 059   | 935   | 987   | 293   | 289   | 425   | 118   |

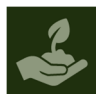

|                                                                                             |      |       |       |       |       |       |       |       |       |       |       |       |       |       |       |       |
|---------------------------------------------------------------------------------------------|------|-------|-------|-------|-------|-------|-------|-------|-------|-------|-------|-------|-------|-------|-------|-------|
| Cyclohexanone, 2-methyl-5-(1-methylethenyl)-(C43)                                           | Mean | 0.124 | 0.124 | 0.124 | 0.124 | 0.615 | 0.354 | 0.325 | 1.596 | 1.990 | 0.975 | 3.197 | 1.748 | 2.316 | 3.035 | 6.229 |
|                                                                                             |      | 394   | 394   | 394   | 394   | 903   | 362   | 892   | 133   | 809   | 916   | 975   | 762   | 316   | 512   | 05    |
|                                                                                             | SE   | 0.033 | 0.033 | 0.033 | 0.033 | 0.383 | 0.103 | 0.222 | 0.166 | 0.432 | 0.147 | 1.077 | 0.093 | 0.414 | 0.244 | 1.111 |
| 1,6-Cyclodecadiene, 1-methyl-5-methylene-8-(1-methylethyl)-, [S-(E,E)]-.beta.-copaene (C44) | Mean | 0.699 | 0.699 | 0.699 | 0.699 | 0.393 | 0.883 | 0.123 | 0.039 | 0.122 | 0.104 | 0.033 | 0.035 | 0.134 | 0.059 | 0.030 |
|                                                                                             |      | 837   | 837   | 837   | 837   | 696   | 716   | 954   | 109   | 425   | 449   | 284   | 373   | 186   | 79    | 221   |
|                                                                                             | SE   | 0.064 | 0.064 | 0.064 | 0.064 | 0.100 | 0.608 | 0.064 | 0.001 | 0.026 | 0.017 | 0.005 | 0.004 | 0.022 | 0.007 | 0.004 |
| Pulegone (C45)                                                                              | Mean | 0.011 | 0.011 | 0.011 | 0.011 | 0.010 | 0.003 | 0.007 | 0.075 | 0.039 | 0.031 | 0.052 | 0.129 | 0.036 | 0.048 | 0.105 |
|                                                                                             |      | 657   | 657   | 657   | 657   | 964   | 463   | 019   | 189   | 53    | 511   | 66    | 994   | 926   | 56    | 433   |
|                                                                                             | SE   | 0.004 | 0.004 | 0.004 | 0.004 | 0.005 | 0.001 | 0.006 | 0.010 | 0.007 | 0.008 | 0.010 | 0.008 | 0.005 | 0.005 | 0.005 |
| (E)-.beta.-Farnesene+Humulene (C46)                                                         | Mean | 1.820 | 1.820 | 1.820 | 1.820 | 0.654 | 0.589 | 0.224 | 0.127 | 0.357 | 0.305 | 0.099 | 0.118 | 0.480 | 0.272 | 0.160 |
|                                                                                             |      | 652   | 652   | 652   | 652   | 237   | 867   | 598   | 013   | 942   | 667   | 993   | 682   | 578   | 906   | 215   |
|                                                                                             | SE   | 0.325 | 0.325 | 0.325 | 0.325 | 0.140 | 0.091 | 0.112 | 0.000 | 0.079 | 0.041 | 0.012 | 0.008 | 0.104 | 0.049 | 0.025 |
| (+)-.epi-Bicyclosquiphellandrene (C47)                                                      | Mean | 1.052 | 1.052 | 1.052 | 1.052 | 0.532 | 0.491 | 0.171 | 0.072 | 0.165 | 0.137 | 0.037 | 0.041 | 0.189 | 0.091 | 0.057 |
|                                                                                             |      | 15    | 15    | 15    | 15    | 601   | 658   | 432   | 847   | 747   | 023   | 904   | 356   | 779   | 538   | 138   |
|                                                                                             | SE   | 0.148 | 0.148 | 0.148 | 0.148 | 0.136 | 0.012 | 0.085 | 0.002 | 0.036 | 0.017 | 0.009 | 0.007 | 0.041 | 0.007 | 0.010 |
| .alpha.-Terpineol (C48)                                                                     | Mean | 0.025 | 0.025 | 0.025 | 0.025 | 0.012 | 0.007 | 0.017 | 0.057 | 0.036 | 0.036 | 0.065 | 0.067 | 0.041 | 0.049 | 0.070 |
|                                                                                             |      | 327   | 327   | 327   | 327   | 829   | 415   | 557   | 864   | 187   | 788   | 232   | 252   | 564   | 041   | 54    |
|                                                                                             | SE   | 0.003 | 0.003 | 0.003 | 0.003 | 0.008 | 0.005 | 0.009 | 0.003 | 0.001 | 0.005 | 0.001 | 0.000 | 0.003 | 0.003 | 0.002 |
| 1,6-Cyclodecadiene, 1-methyl-5-methylene-8-(1-methylethyl)-, [S-(E,E)]- (C49)               | Mean | 4.855 | 4.855 | 4.855 | 4.855 | 1.506 | 1.197 | 0.536 | 0.380 | 0.869 | 0.713 | 0.335 | 0.376 | 1.183 | 0.608 | 0.437 |
|                                                                                             |      | 246   | 246   | 246   | 246   | 799   | 125   | 719   | 563   | 852   | 183   | 084   | 269   | 963   | 4     | 652   |
|                                                                                             | SE   | 0.824 | 0.824 | 0.824 | 0.824 | 0.447 | 0.365 | 0.271 | 0.001 | 0.169 | 0.058 | 0.030 | 0.008 | 0.317 | 0.029 | 0.034 |
|                                                                                             |      | 733   | 733   | 733   | 733   | 259   | 682   | 583   | 781   | 736   | 647   | 619   | 895   | 53    | 067   | 105   |



|                                                                                                                              |      |       |       |       |       |       |       |       |       |       |       |       |       |       |       |       |
|------------------------------------------------------------------------------------------------------------------------------|------|-------|-------|-------|-------|-------|-------|-------|-------|-------|-------|-------|-------|-------|-------|-------|
| Cyclohexene, 3-methyl-6-(1-methylethenyl)-, (3R-trans)- (C50)                                                                | Mean | 2.170 | 2.170 | 2.170 | 2.170 | 2.565 | 1.577 | 1.773 | 5.529 | 5.182 | 3.706 | 8.175 | 5.380 | 5.494 | 7.471 | 10.93 |
|                                                                                                                              |      | 304   | 304   | 304   | 304   | 47    | 111   | 773   | 737   | 215   | 798   | 555   | 392   | 059   | 649   | 879   |
|                                                                                                                              | SE   | 0.309 | 0.309 | 0.309 | 0.309 | 1.128 | 0.619 | 0.996 | 0.253 | 0.652 | 0.401 | 1.044 | 0.266 | 0.579 | 0.823 | 1.840 |
| D-Carvone (C51)                                                                                                              |      | 683   | 683   | 683   | 683   | 869   | 904   | 238   | 762   | 842   | 634   | 832   | 552   | 399   | 057   | 811   |
|                                                                                                                              | Mean | 31.63 | 31.63 | 31.63 | 31.63 | 47.31 | 42.40 | 45.42 | 79.17 | 68.16 | 68.26 | 77.49 | 76.36 | 66.53 | 71.83 | 69.35 |
|                                                                                                                              |      | 179   | 179   | 179   | 179   | 182   | 212   | 261   | 707   | 317   | 3     | 976   | 924   | 829   | 142   | 751   |
|                                                                                                                              | SE   | 2.558 | 2.558 | 2.558 | 2.558 | 12.89 | 7.484 | 22.89 | 0.628 | 1.897 | 4.377 | 2.343 | 0.372 | 1.402 | 1.424 | 4.069 |
|                                                                                                                              |      | 176   | 176   | 176   | 176   | 43    | 604   | 325   | 705   | 128   | 468   | 134   | 107   | 375   | 638   | 222   |
|                                                                                                                              | Mean | 0.098 | 0.098 | 0.098 | 0.098 | 0.025 | 0.019 | 0.004 | 0.041 | 0.011 | 0.012 | 0.111 | 0.062 | 0.008 | 0.021 | 0.122 |
| Spiro[2.4]heptane, 1,5-dimethyl-6-methylene-/Cyclohexanol, 2-methyl-5-(1-methylethenyl)-, (1.alpha.,2.beta.,5.alpha.)- (C52) |      | 96    | 96    | 96    | 96    | 31    | 054   | 429   | 129   | 671   | 082   | 56    | 496   | 088   | 792   | 411   |
|                                                                                                                              | SE   |       |       |       |       |       |       |       |       |       |       |       |       |       |       |       |
|                                                                                                                              |      | 0.024 | 0.024 | 0.024 | 0.024 | 0.004 | 0.007 | 0.002 | 0.002 | 0.004 | 0.004 | 0.011 | 0.008 | 0.002 | 0.016 | 0.006 |
| 4-isopropyl-1,6-dimethyl-1,2,3,4-tetrahydronaphthalene (C53)                                                                 |      | 694   | 694   | 694   | 694   | 282   | 231   | 238   | 601   | 588   | 679   | 531   | 638   | 056   | 07    | 614   |
|                                                                                                                              | Mean | 0.265 | 0.265 | 0.265 | 0.265 | 0.140 | 0.109 | 0.053 | 0.032 | 0.036 | 0.030 | 0.024 | 0.030 | 0.031 | 0.018 | 0.026 |
|                                                                                                                              |      | 045   | 045   | 045   | 045   | 659   | 93    | 212   | 436   | 026   | 352   | 203   | 925   | 504   | 375   | 68    |
|                                                                                                                              | SE   | 0.038 | 0.038 | 0.038 | 0.038 | 0.037 | 0.009 | 0.026 | 0.002 | 0.004 | 0.003 | 0.001 | 0.001 | 0.005 | 0.001 | 0.004 |
|                                                                                                                              |      | 342   | 342   | 342   | 342   | 22    | 786   | 7     | 469   | 519   | 633   | 024   | 023   | 72    | 868   | 71    |
|                                                                                                                              | Mean | 0.023 | 0.023 | 0.023 | 0.023 | 0.011 | 0.007 | 0.008 | 0.006 | 0.048 | 0.054 | 0.024 | 0.033 | 0.039 | 0.039 | 0.035 |
| Anethole (C54)                                                                                                               |      | 759   | 759   | 759   | 759   | 006   | 922   | 181   | 741   | 64    | 227   | 45    | 593   | 354   | 669   | 287   |
|                                                                                                                              | SE   | 0.004 | 0.004 | 0.004 | 0.004 | 0.001 | 0.000 | 0.006 | 7.72E | 0.002 | 0.008 | 0.008 | 0.003 | 0.005 | 0.005 | 0.006 |
|                                                                                                                              |      | 942   | 942   | 942   | 942   | 377   | 898   | 393   | -05   | 14    | 443   | 29    | 794   | 601   | 943   | 38    |
| 2-Cyclohexen-1-ol, 2-methyl-5-(1-methylethenyl)-, cis- (C55)                                                                 | Mean | 3.542 | 3.542 | 3.542 | 3.542 | 2.478 | 1.945 | 2.883 | 6.059 | 3.903 | 4.527 | 4.735 | 10.90 | 4.233 | 5.887 | 7.124 |
|                                                                                                                              |      | 842   | 842   | 842   | 842   | 953   | 551   | 199   | 219   | 911   | 137   | 293   | 846   | 342   | 573   | 883   |
|                                                                                                                              | SE   | 0.218 | 0.218 | 0.218 | 0.218 | 0.233 | 0.574 | 1.462 | 1.915 | 0.456 | 0.388 | 1.040 | 0.510 | 0.330 | 0.506 | 0.952 |
| Butylated Hydroxytoluene/phe                                                                                                 |      | 887   | 887   | 887   | 887   | 982   | 181   | 782   | 367   | 203   | 024   | 058   | 074   | 403   | 857   | 156   |
|                                                                                                                              | Mean |       |       |       |       |       | 0.172 | 0.039 | 0.063 | 0.115 | 0.239 | 0.081 | 0.049 | 0.162 | 0.251 | 0.087 |
|                                                                                                                              |      | 0     | 0     | 0     | 0     | 0     | 167   | 566   | 047   | 267   | 892   | 862   | 349   | 262   | 11    | 025   |





|                                                                   |      |       |       |       |       |       |       |       |       |       |       |       |       |       |       |       |
|-------------------------------------------------------------------|------|-------|-------|-------|-------|-------|-------|-------|-------|-------|-------|-------|-------|-------|-------|-------|
| nylethyl alcohol<br>(C56)                                         | SE   |       |       |       |       |       | 0.045 | 0.022 | 3.51E | 0.026 | 0.033 | 0.014 | 0.001 | 0.013 | 0.061 | 0.005 |
|                                                                   |      | 0     | 0     | 0     | 0     | 0     | 932   | 54    | -05   | 317   | 793   | 78    | 096   | 136   | 474   | 448   |
| 2-Cyclopenten-1-<br>one, 3-methyl-2-(2-<br>pentenyl)-, (Z)- (C57) | Mean | 0.003 | 0.003 | 0.003 | 0.003 | 0.002 | 0.039 | 0.002 | 0.092 | 0.005 | 0.010 | 0.034 | 0.147 | 0.004 | 0.012 | 0.080 |
|                                                                   |      | 249   | 249   | 249   | 249   | 953   | 301   | 305   | 213   | 922   | 632   | 604   | 394   | 877   | 176   | 371   |
|                                                                   | SE   | 4.95E | 4.95E | 4.95E | 4.95E | 0.000 | 0.035 | 0.001 | 0.018 | 0.000 | 0.002 | 0.008 | 0.015 | 0.000 | 0.001 | 0.011 |
| Benzothiazole (C58)                                               |      | -05   | -05   | -05   | -05   | 768   | 943   | 414   | 057   | 611   | 114   | 299   | 878   | 529   | 796   | 703   |
|                                                                   | Mean | 0.025 | 0.025 | 0.025 | 0.025 | 0.034 | 0.030 | 0.014 | 0.019 | 0.078 | 0.075 | 0.047 | 0.051 | 0.054 | 0.056 | 0.068 |
|                                                                   |      | 524   | 524   | 524   | 524   | 065   | 572   | 495   | 301   | 36    | 02    | 777   | 866   | 473   | 901   | 176   |
|                                                                   | SE   | 0.005 | 0.005 | 0.005 | 0.005 | 0.011 | 0.002 | 0.009 | 0.001 | 0.005 | 0.003 | 0.011 | 0.011 | 0.013 | 0.005 | 0.019 |
| Sum area peak                                                     |      | 119   | 119   | 119   | 119   | 213   | 355   | 215   | 149   | 926   | 657   | 053   | 045   | 976   | 46    | 071   |
|                                                                   | Mean | 99.99 | 99.99 | 99.99 | 99.99 | 99.91 | 99.62 | 99.73 | 99.90 | 99.88 | 99.73 | 99.92 | 99.97 | 99.90 | 99.81 | 99.95 |
|                                                                   |      | 388   | 388   | 388   | 388   | 344   | 237   | 344   | 166   | 536   | 623   | 616   | 744   | 514   | 574   | 828   |
|                                                                   | SE   | 0.003 | 0.003 | 0.003 | 0.003 | 0.003 | 0.306 | 0.066 | 0.004 | 0.031 | 0.038 | 0.002 | 0.002 | 0.017 | 0.054 | 0.006 |
|                                                                   |      | 593   | 593   | 593   | 593   | 901   | 133   | 005   | 229   | 595   | 243   | 102   | 2     | 612   | 512   | 369   |
